# Supplementary material
Source: HighWire-hosted journal article supplement (http://molpharm.aspetjournals.org/highwire/filestream/76809/field_highwire_adjunct_files/0/Supplemental_Material.pdf)
Supplement: Supplemental_Material.pdf [file Supplemental_Material.pdf]

## **Supplemental Material**

**for**

### **Identification of Novel Small-Molecule Agonists for Human Formyl Peptide Receptors and Pharmacophore Models of their Recognition**

Liliya N. Kirpotina<sup>a</sup>, Andrei I. Khlebnikov<sup>a</sup>, Igor A Schepetkin<sup>a</sup>, Richard D. Ye<sup>c</sup>, Marie-Josèphe Rabiet<sup>d</sup>, Mark A. Jutila<sup>a</sup>, and Mark T. Quinn<sup>a</sup>

<sup>a</sup>Department of Veterinary Molecular Biology, Montana State University, Bozeman, MT 59717, USA

<sup>b</sup>Department of Chemistry, Altai State Technical University, Barnaul 656038, Russia

<sup>c</sup>Department of Pharmacology, University of Illinois, Chicago, IL 60612

<sup>d</sup>CEA, DSV, iRTSV, Laboratoire Biochimie et Biophysique des Systèmes Intégrés, Grenoble, France (M.-J.R.)

**Supplemental Table S1. Structure and Activity of Acetohydrazide Derivatives**

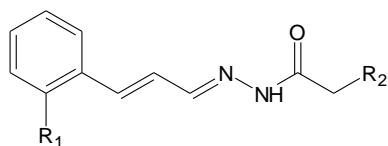

| #         | R <sub>1</sub>     | R <sub>2</sub> | Ca <sup>2+</sup> Mobilization<br>EC <sub>50</sub> (μM) and Efficacy (%) <sup>a</sup> |      |           |           |            |
|-----------|--------------------|----------------|--------------------------------------------------------------------------------------|------|-----------|-----------|------------|
|           |                    |                | FPR1                                                                                 |      | FPR2      |           | PMN        |
|           |                    |                | RBL                                                                                  | HL60 | RBL       | HL-60     |            |
| AG-09/92  | NO <sub>2</sub>    |                | N.A.                                                                                 | N.A. | 6.0 (30)  | 1.6 (20)  | 3.7 (80)   |
| AG-09/93  | NO <sub>2</sub>    |                | N.A.                                                                                 | N.A. | 2.9 (80)  | 2.9 (30)  | 2.2 (30)   |
| AG-09/94  | NO <sub>2</sub>    |                | N.A.                                                                                 | N.A. | N.A.      | N.A.      | N.A.       |
| AG-09/95  | NO <sub>2</sub>    |                | N.A.                                                                                 | N.A. | N.A.      | N.A.      | N.A.       |
| AG-09/96  | NO <sub>2</sub>    |                | N.A.                                                                                 | N.A. | 17.2 (30) | 14.3 (40) | 35.4 (100) |
| AG-09/97  | NO <sub>2</sub>    |                | N.A.                                                                                 | N.A. | N.A.      | N.A.      | N.A.       |
| AG-09/98  | NO <sub>2</sub>    |                | N.A.                                                                                 | N.A. | N.A.      | N.A.      | 17.0 (110) |
| AG-09/99  | -O-CH <sub>3</sub> |                | N.A.                                                                                 | N.A. | N.A.      | N.A.      | N.A.       |
| AG-09/100 | NO <sub>2</sub>    |                | N.A.                                                                                 | N.A. | N.A.      | N.A.      | N.A.       |
| AG-09/101 |                    |                | N.A.                                                                                 | N.A. | 3.9 (95)  | 2.6 (105) | 1.1 (110)  |
| AG-09/7   |                    |                | N.A.                                                                                 | N.A. | 5.4 (70)  | 11.2 (50) | 10.8 (35)  |
| AG-09/102 |                    |                | N.A.                                                                                 | N.A. | N.A.      | N.A.      | N.A.       |

<sup>a</sup>Median effective concentration values (EC<sub>50</sub>) were determined by nonlinear regression analysis of the dose-response curves (5-6 points) generated using GraphPad Prism 5 with 95% confidential interval ( $p < 0.05$ ). Efficacy (in parentheses) is expressed as % of the response induced by 5 nM fMLF (FPR1) or 5 nM WKYMVm (FPR2). N.A., very low response (efficacy <20% of positive control) or no activity (no Ca<sup>2+</sup> flux response was observed during the 3 min after addition of compounds under investigation).

## Supplemental Figure S1

### Correlation of $\text{Ca}^{2+}$ mobilization and Chemotaxis in Human Neutrophils Treated with the Selected FPR1/FPR2 Agonists

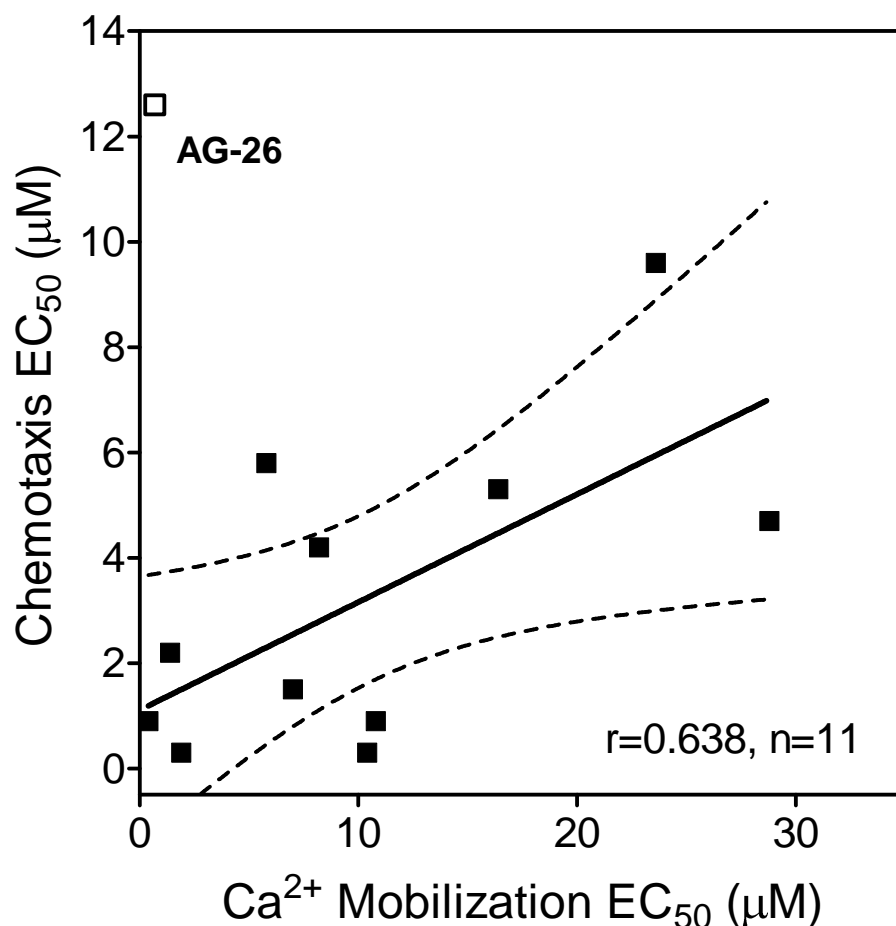

**Legend:**  $\text{EC}_{50}$  values for  $\text{Ca}^{2+}$  mobilization in human neutrophils were plotted versus  $\text{EC}_{50}$  values for chemotactic activity in human neutrophils for the selected compounds (see Figure 1 and Table 1). Compound **AG-26** was omitted from the regression calculation and is shown as outlier. Dashed lines indicate area of the 95% confidence band.

## Supplemental Figure S2

### Desensitization of FPR2 Response by Low Efficacy Agonists

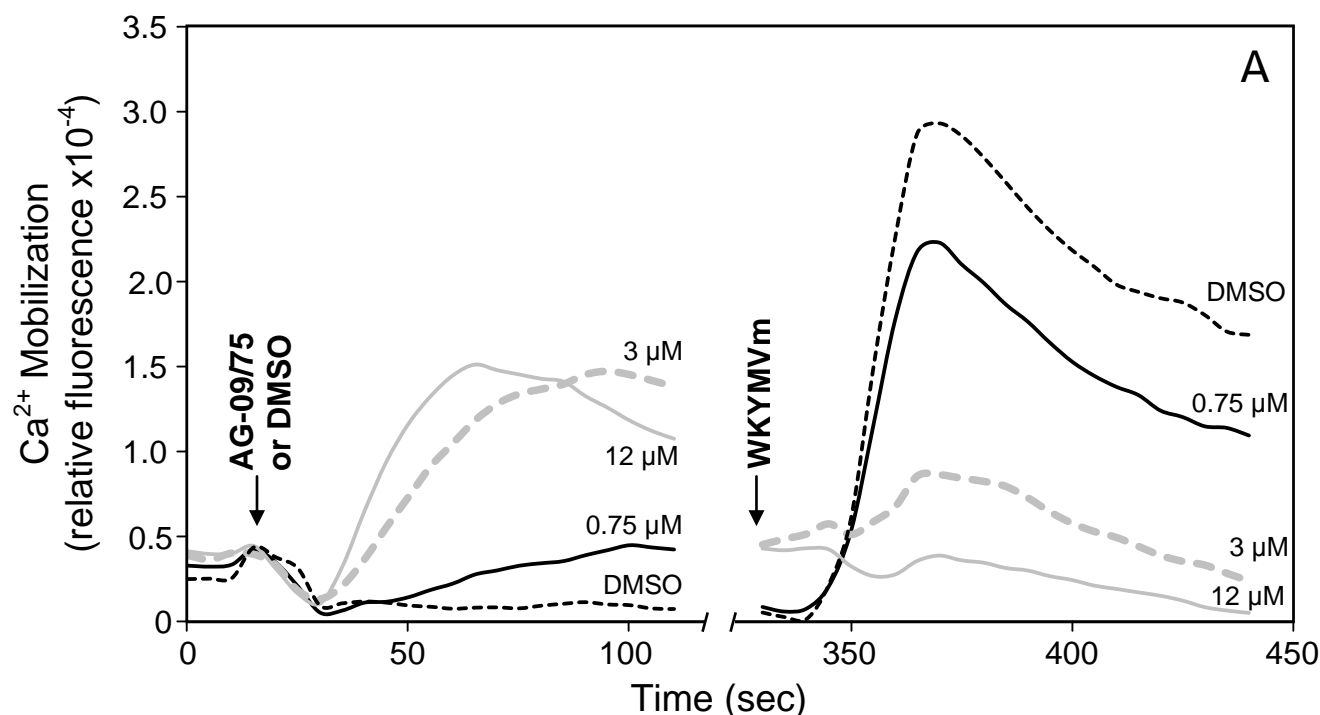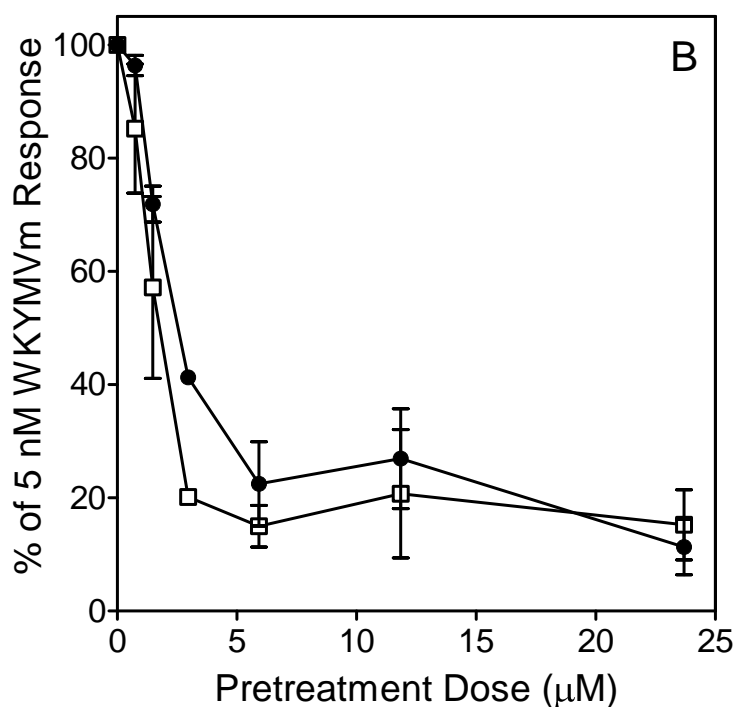

**Legend:** **Panel A.** HL-60 FPR2 cells were loaded with Fluo-4AM dye and pretreated with 0.75, 3, or 12  $\mu\text{M}$  **AG-09/75** or vehicle (DMSO), and calcium flux was monitored. The same wells were then treated with 5 nM WKYMVm, and calcium flux was monitored following this second treatment. **Panel B.** HL-60 FPR2 cells were loaded with Fluo-4AM dye and pretreated for 5 minutes with the indicated concentrations of **AG-09/75** ( $\square$ ) and **AG-09/76** ( $\bullet$ ). Control cells were pretreated with DMSO. Following pretreatment, 5 nM WKYMVm was added, and calcium flux was monitored as described. The data are presented as mean  $\pm$  S.D. of duplicate samples. In both panels, the data are representative of three experiments.

## Supplemental Figure S3

### The Best Overlays of Antagonists on FPR1 and FPR2 Templates

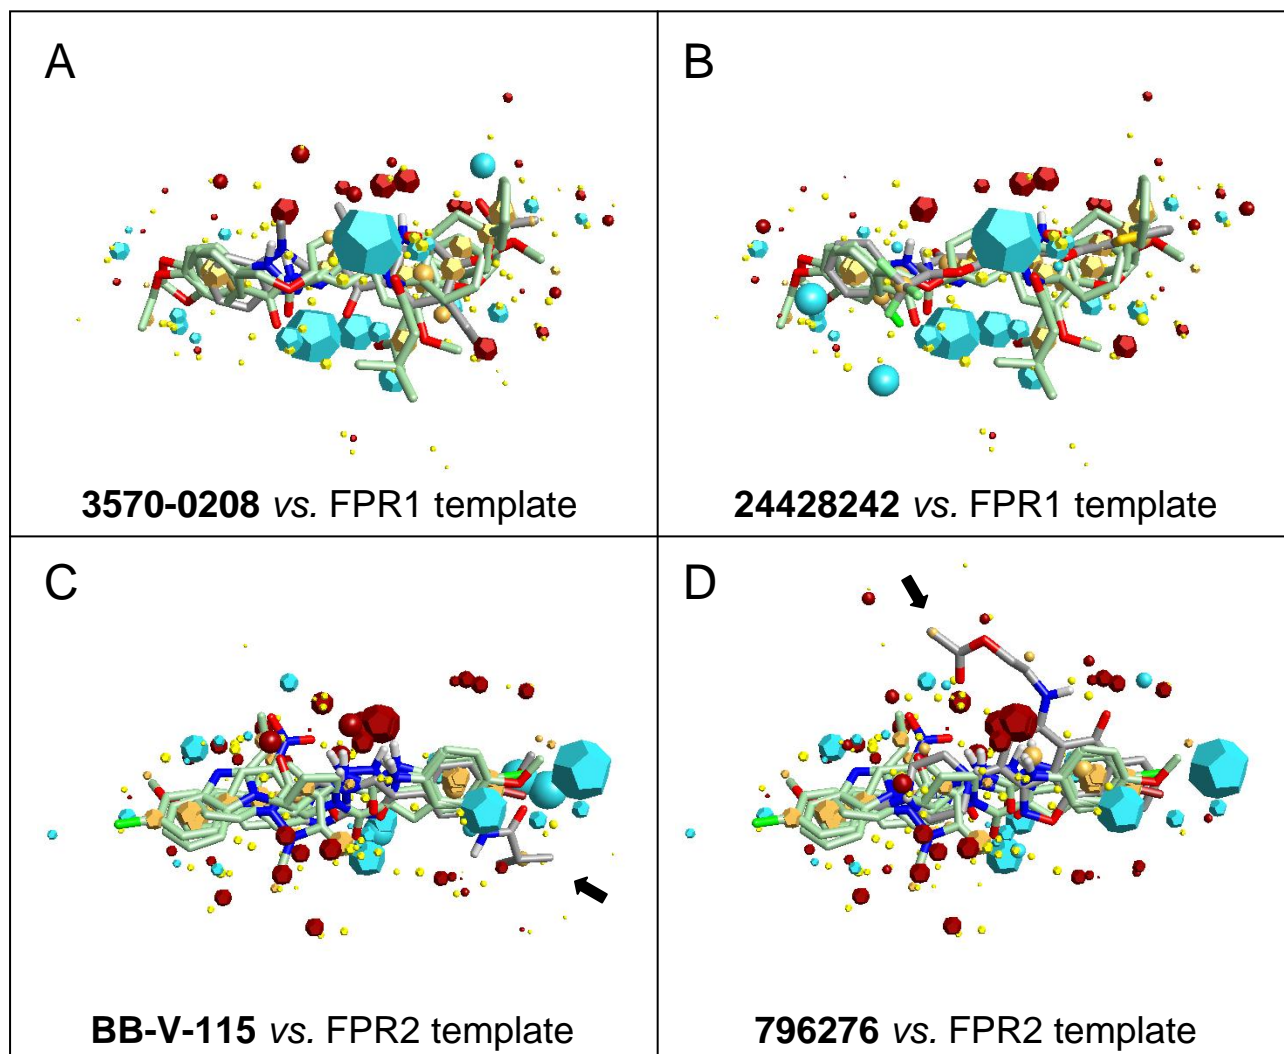

**Legend:** Overlay of **3570-0208** (panel A) and **24428242** (panel B) on the FPR1 template and **BB-V-115** (panel C) and **796276** (panel B) on the FPR2 template. Field points of the FPR1/FPR2 templates are shown by polyhedra, field points of antagonist molecules are shown by spheres, and inhibitor conformations are depicted with grey skeletons. Field points are colored as follows: blue = electron-rich (negative); red = electron-deficient (positive); yellow = van der Waals attractive (steric); and orange = hydrophobic. Arrows indicate fragments of antagonist molecules that don't overlap with the agonist template.
